# Supplementary material for: Distinct changes in carbon, nitrogen, and phosphorus cycling in the litter layer across two contrasting forest-tundra ecotones
Source: Copernicus journal article supplement (doi:10.5194/egusphere-2024-2622), 2024-09-10
Supplement: Supplementary file 1 [file egusphere-2024-2622-supplement.pdf]

## Contents

|                                                                                           | page |
|-------------------------------------------------------------------------------------------|------|
| S1: Table S1 Litter characteristics                                                       | 2    |
| S 2: Table S2 'Plant available' extractable N and P                                       | 3    |
| S 3: Figure S1 Fourier-transformed infrared spectroscopy data of<br>litter layer material | 4    |
| S 4: Figure S2 Carbon (C) mineralization of litter layer material                         | 5    |
| S 5: Figure S3 Activity of extracellular enzymes in the litter layer                      | 6    |
| S 6: Figure S4 Tracking <sup>13</sup> C labelled glucose-6-phosphate                      | 7    |
| S 7: Figure S5 Release of inorganic phosphorus from added<br>glucose-6-phosphate          | 8    |

## S 1 Litter characteristics

Table S1: Concentrations of Ca, Fe, K, Mg, and Mn in the litter layer of treeline ecotones in the Khibiny mountains and South Urals. Means of three replicates per site type.

| Region       | Elevation              | Vegetation | Ca<br>(mg/kg) | Mg<br>(mg/kg) | K<br>(mg/kg) | Fe<br>(mg/kg) | Mn<br>(mg/kg) |
|--------------|------------------------|------------|---------------|---------------|--------------|---------------|---------------|
| Khibiny      | Tundra                 | Open       | 5256          | 823           | 2464         | 3694          | 607           |
|              |                        | Treeline   | 4843          | 766           | 2183         | 3395          | 198           |
|              | Forest                 | Tree       | 10239         | 1281          | 2679         | 2952          | 1012          |
|              |                        | Open       | 9187          | 950           | 1741         | 2002          | 962           |
|              |                        | Tree       | 14057         | 1972          | 2595         | 2626          | 3291          |
| South Urals  | Tundra                 | Open       | 1729          | 595           | 1550         | 1277          | 233           |
|              |                        | Treeline   | 2294          | 684           | 1893         | 1282          | 277           |
|              | Forest                 | Tree       | 5874          | 1053          | 1627         | 1106          | 1627          |
|              |                        | Open       | 8469          | 1551          | 2831         | 3980          | 1072          |
|              |                        | Tree       | 10135         | 1205          | 2862         | 3267          | 1239          |
| Significance |                        |            |               |               |              |               |               |
|              | Region                 |            | <0.0001       | 0.13          | 0.16         | 0.0008        | 0.78          |
|              | Elevation              |            | <0.0001       | <0.0001       | 0.17         | 0.95          | 0.0001        |
|              | Vegetation             |            | <0.0001       | 0.0004        | 0.1          | 0.01          | 0.019         |
|              | Region x Elevation     |            | 0.23          | 0.23          | 0.2          | 0.76          | 0.23          |
|              | Elevation x Vegetation |            | 0.13          | 0.53          | 0.29         | 0.31          | 0.63          |

## S 2: 'Plant available' extractable N and P

Table S2: 'Plant-available' nitrogen (N;  $\text{NH}_4^+$  +  $\text{NO}_3^-$ ) and phosphorus (P) from 0-20 cm across the forest-tundra ecotone in the Khibiny mountains and South Urals. Means and standard errors of 6 replicates per site type.

|                     |          |      | Mineral N                           | Soil P <sub>Bray</sub>              |
|---------------------|----------|------|-------------------------------------|-------------------------------------|
|                     |          |      | [mg N * kg dry soil <sup>-1</sup> ] | [mg P * kg dry soil <sup>-1</sup> ] |
| Khibiny             | Tundra   |      | 0.85 ± 0.27                         | 5.79 ± 1.73                         |
| Mountains           | Treeline | Open | 1.06 ± 0.39                         | 3.82 ± 0.69                         |
|                     | Treeline | Tree | 4.31 ± 2.14                         | 8.62 ± 2.78                         |
|                     | Forest   | Open | 1.00 ± 0.16                         | 8.92 ± 2.94                         |
|                     | Forest   | Tree | 13.81 ± 4.26                        | 21.34 ± 4.50                        |
| South<br>Urals      | Tundra   |      | 21.92 ± 4.22                        | 11.99 ± 2.48                        |
|                     | Treeline | Open | 26.77 ± 3.84                        | 13.80 ± 2.67                        |
|                     | Treeline | Tree | 40.31 ± 2.14                        | 16.37 ± 2.22                        |
|                     | Forest   | Open | 39.59 ± 2.43                        | 15.43 ± 1.86                        |
|                     | Forest   | Tree | 45.86 ± 4.36                        | 19.34 ± 2.32                        |
| Significance        |          |      |                                     |                                     |
| Region              |          |      | 0.003                               | 0.041                               |
| Elevation           |          |      | <0.0001                             | 0.0022                              |
| Vegetation          |          |      | <0.0001                             | 0.0073                              |
| Region x Elevation  |          |      | 0.6                                 | 0.15                                |
| Region x Vegetation |          |      | 0.2                                 | 0.14                                |

### S 3: Fourier-transformed infrared spectroscopy of litter layer material

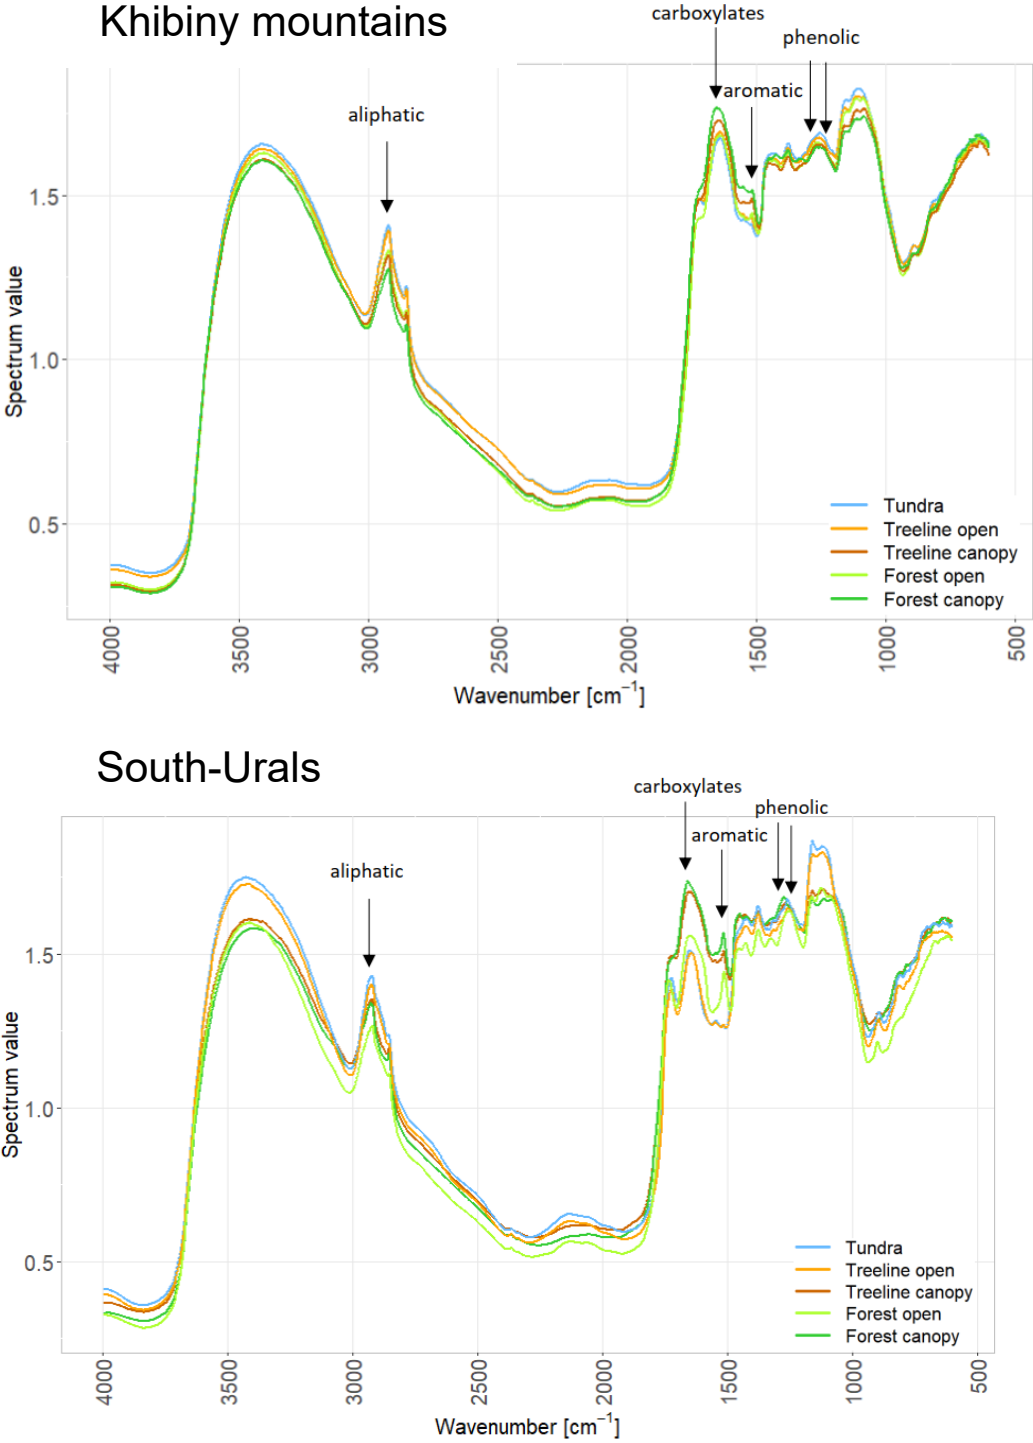

**Figure S1:** FT-IR spectra showing mean absorbance of three replicates per ecosystem type (tundra, treeline open, treeline canopy, forest open, forest canopy), for each of which duplicate measurements were taken (n=6).

#### S 4: Carbon mineralization rates of litter layer material at 5°C and 15°C

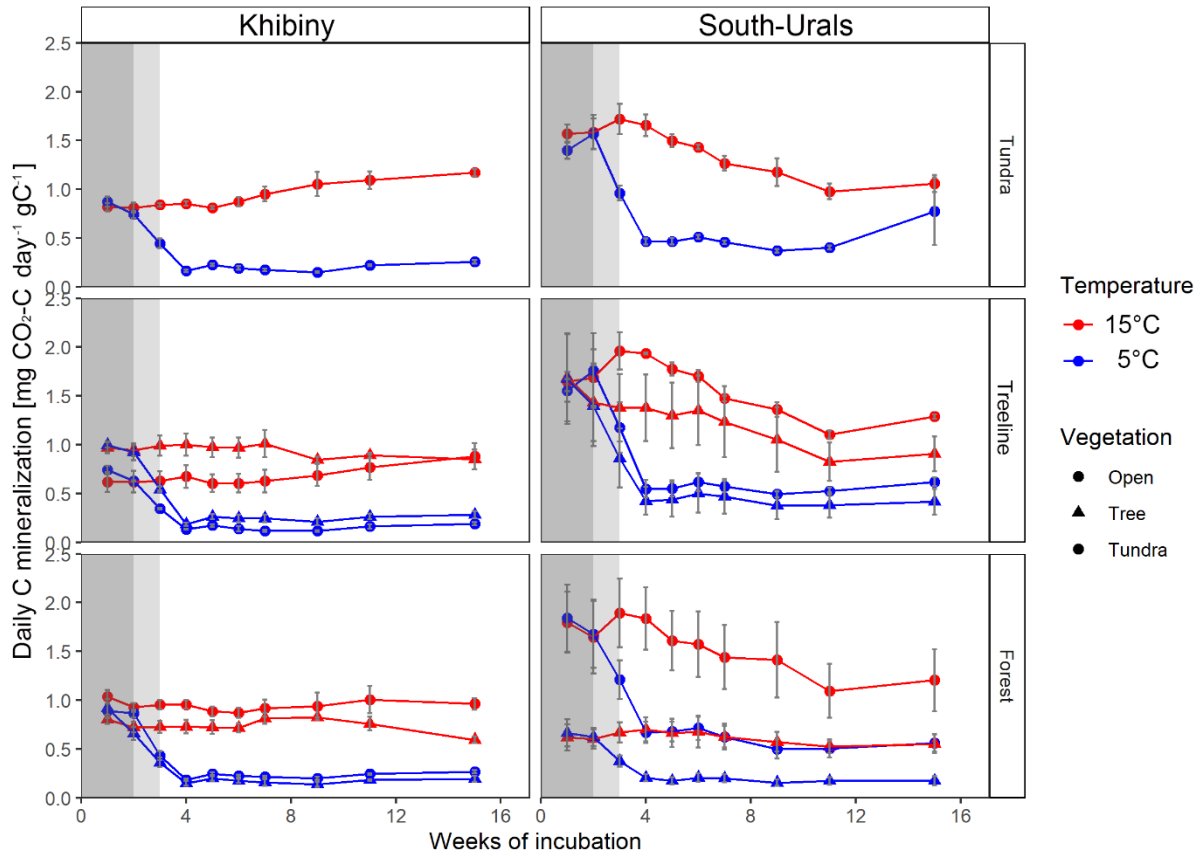

**Figure S2:** Daily carbon (C) mineralization (in mg CO<sub>2</sub>-C per day and g C) of litter layer material at the two study sites Khibiny (left panel) and the South-Urals (right panel) for the five vegetation types (tundra, open and closed forest patches at the treeline, open and closed forest patches in the established forest) at two temperatures (5°C, blue line, 15°C, red line). The dark grey area indicates the precondition phase of two weeks at 15°C, the light grey area the transition phase. Means and standard error of three replicates. Cumulative values had been estimated for the period following the 4<sup>th</sup> week, when C mineralization rates had ‘acclimatized’ to the colder temperatures.

## S 5: Activity of extracellular enzymes in the litter layer

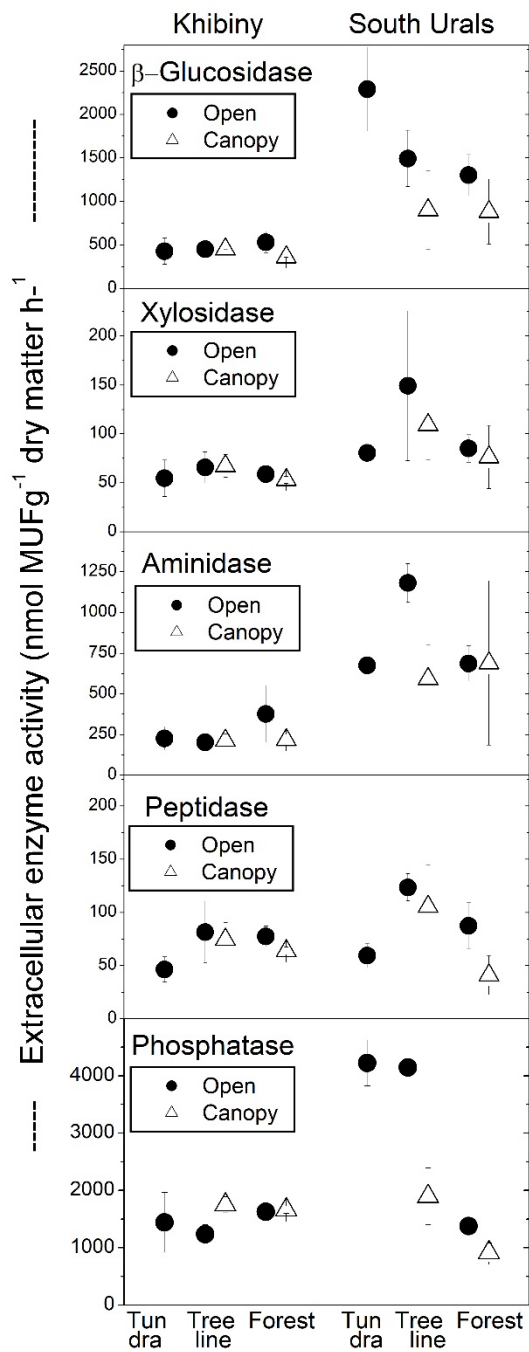

**Figure S3:** Potential activity of element acquiring extracellular enzymes across the forest-tundra ecotones in Khibiny and South Urals. Tundra, treeline, and forest span distinct elevation gradients. Samples at treeline and forest were sampled under tree canopy and adjacent open areas. Means and standard error of three plots after a 12-week long incubation at 15°C.

## S 6: Tracking $^{13}\text{C}$ labelled glucose-6-phosphate to estimate substrate-use efficiency

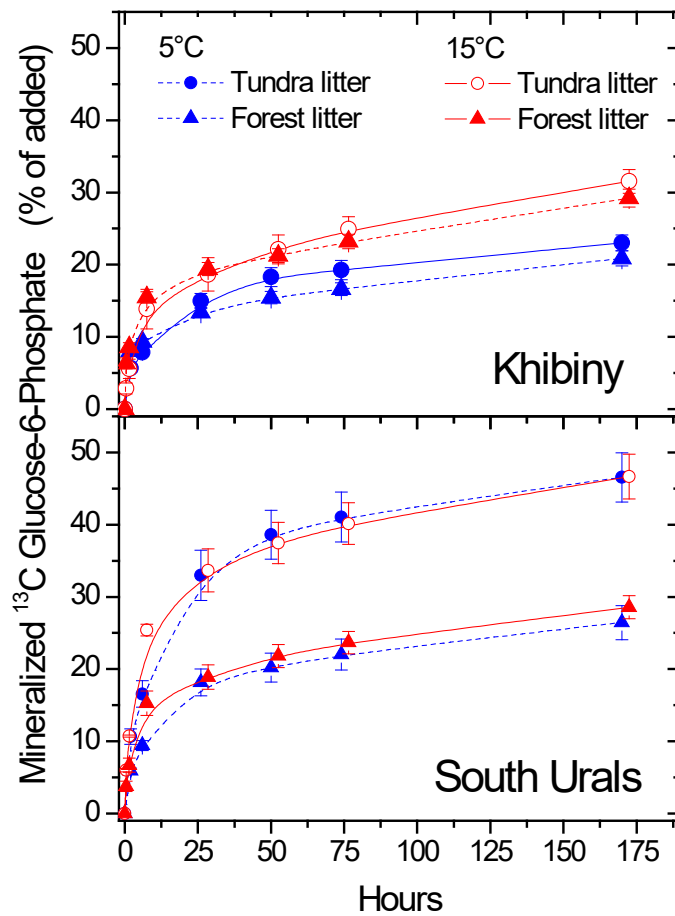

**Figure S4:** Mineralization of  $^{13}\text{C}$  labelled glucose-6-phosphate from the litter layer in the tundra (50 m above species line) and under the forest canopy (100 m below species line) in the Khibiny mountains and South Urals. Means and standard error of three replicates incubated at 5°C and 15°C.

## S 7: Release of inorganic phosphorus from added glucose-6-phosphate

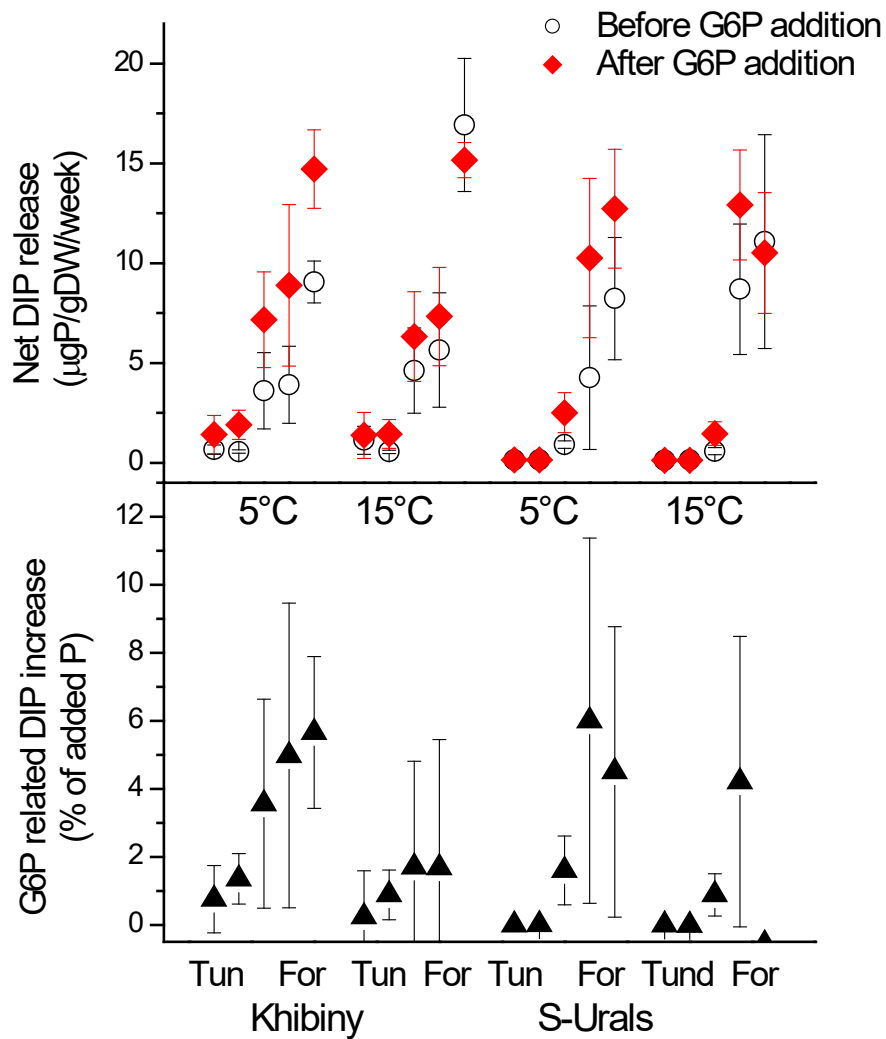

**Figure S5:** Release of dissolved inorganic phosphorus (DIP) from the litter layer across the treeline ecotone at Khibiny and the South Urals at 5°C and 15°C following the addition of 0.175 mg glucose-6-phosphate-P (G6P). Means and standard errors of three replicates per sample type.
